# Supplementary material
Source: PubMed Central journal article supplement (PMC1488916)
Supplement: plntcell_tpc.105.036269_1.pdf [file plntcell_tpc.105.036269_1.pdf]

**Supplemental Table I: Metabolite contents of C24 and *rsr4-1*.**

Significant changes ( $P < 0.05$ ) are marked in bold. Calibration was performed exactly as described in Roessner-Tunali *et al.* (2003).

|                             | C24 (nmol/g FW) |                      | <i>rsr4-1</i> (nmol/g FW) |                      |
|-----------------------------|-----------------|----------------------|---------------------------|----------------------|
| <b><i>Amino acids</i></b>   |                 |                      |                           |                      |
| <b>alanine</b>              | <b>191.95</b>   | $\pm$ <b>8.10</b>    | <b>131.79</b>             | $\pm$ <b>16.55</b>   |
| Arginine                    | 6.47            | $\pm$ 0.76           | 6.63                      | $\pm$ 2.38           |
| asparagine                  | 407.40          | $\pm$ 38.25          | 393.68                    | $\pm$ 159.82         |
| <b>aspartate</b>            | <b>28.55</b>    | $\pm$ <b>2.58</b>    | <b>76.55</b>              | $\pm$ <b>21.62</b>   |
| <b>beta-alanine</b>         | <b>5.36</b>     | $\pm$ <b>0.49</b>    | <b>8.98</b>               | $\pm$ <b>0.45</b>    |
| gamma-aminobutyrate         | 48.43           | $\pm$ 8.34           | 39.14                     | $\pm$ 5.42           |
| Glutamate                   | 329.67          | $\pm$ 36.92          | 558.96                    | $\pm$ 114.84         |
| glutamine                   | 3435.42         | $\pm$ 1150.34        | 1697.79                   | $\pm$ 291.81         |
| <b>glycine</b>              | <b>267.44</b>   | $\pm$ <b>40.91</b>   | <b>74.06</b>              | $\pm$ <b>11.61</b>   |
| <b>isoleucine</b>           | <b>21.34</b>    | $\pm$ <b>1.65</b>    | <b>37.39</b>              | $\pm$ <b>4.55</b>    |
| Leucine                     | <b>16.02</b>    | $\pm$ <b>1.76</b>    | <b>34.17</b>              | $\pm$ <b>4.32</b>    |
| ornithine                   | 30.17           | $\pm$ 3.72           | 35.02                     | $\pm$ 16.58          |
| <b>phenylalanine</b>        | <b>7.88</b>     | $\pm$ <b>0.53</b>    | <b>16.13</b>              | $\pm$ <b>2.65</b>    |
| Pyroglutamate               | 526.28          | $\pm$ 77.73          | 846.06                    | $\pm$ 150.09         |
| <b>proline</b>              | <b>359.69</b>   | $\pm$ <b>58.10</b>   | <b>705.77</b>             | $\pm$ <b>88.00</b>   |
| serine                      | 1772.63         | $\pm$ 244.49         | 2784.52                   | $\pm$ 490.70         |
| <b>threonine</b>            | <b>4473.24</b>  | $\pm$ <b>640.31</b>  | <b>7878.50</b>            | $\pm$ <b>694.22</b>  |
| valine                      | 56.47           | $\pm$ 3.77           | 68.53                     | $\pm$ 5.31           |
| <b>Total amino acids</b>    | <b>11984.39</b> | $\pm$ <b>2318.74</b> | <b>15384.34</b>           | $\pm$ <b>2080.03</b> |
| <b><i>Organic acids</i></b> |                 |                      |                           |                      |
| alpha-keto-glutarate        | 2.04            | $\pm$ 0.26           | 3.69                      | $\pm$ 0.93           |
| <b>benzoate</b>             | <b>968.05</b>   | $\pm$ <b>28.68</b>   | <b>860.33</b>             | $\pm$ <b>33.94</b>   |
| <b>citrate</b>              | <b>47.95</b>    | $\pm$ <b>6.62</b>    | <b>272.80</b>             | $\pm$ <b>72.23</b>   |
| <b>fumarate</b>             | <b>155.88</b>   | $\pm$ <b>18.71</b>   | <b>237.55</b>             | $\pm$ <b>26.99</b>   |
| <b>gluconate</b>            | <b>127.03</b>   | $\pm$ <b>23.26</b>   | <b>66.27</b>              | $\pm$ <b>10.39</b>   |
| <b>glycerate</b>            | <b>30.34</b>    | $\pm$ <b>7.29</b>    | <b>11.00</b>              | $\pm$ <b>0.27</b>    |
| <b>glycolate</b>            | <b>20.42</b>    | $\pm$ <b>0.92</b>    | <b>16.52</b>              | $\pm$ <b>0.85</b>    |
| <b>malate</b>               | <b>670.63</b>   | $\pm$ <b>107.50</b>  | <b>7960.23</b>            | $\pm$ <b>2834.94</b> |
| <b>shikimate</b>            | <b>20.99</b>    | $\pm$ <b>1.88</b>    | <b>9.98</b>               | $\pm$ <b>0.62</b>    |
| Succinate                   | 163.12          | $\pm$ 22.81          | 176.11                    | $\pm$ 31.90          |
| threonate                   | 6.86            | $\pm$ 0.62           | 7.99                      | $\pm$ 1.11           |
| <b>Total organic acids</b>  | <b>9129.23</b>  | $\pm$ <b>909.52</b>  | <b>12686.84</b>           | $\pm$ <b>3349.30</b> |
| <b><i>Sugars</i></b>        |                 |                      |                           |                      |
| arabinose                   | 4.07            | $\pm$ 0.43           | 3.72                      | $\pm$ 0.33           |
| fructose                    | 170.75          | $\pm$ 35.27          | 252.04                    | $\pm$ 86.63          |
| galactose                   | 22.67           | $\pm$ 1.71           | 32.20                     | $\pm$ 6.44           |
| <b>gentiobiose</b>          | <b>63.42</b>    | $\pm$ <b>14.99</b>   | <b>100.40</b>             | $\pm$ <b>6.41</b>    |
| glucose                     | 583.68          | $\pm$ 114.06         | 557.43                    | $\pm$ 166.63         |
| <b>maltose</b>              | <b>33.26</b>    | $\pm$ <b>2.29</b>    | <b>48.69</b>              | $\pm$ <b>3.75</b>    |
| mannose                     | 3.81            | $\pm$ 0.33           | 8.14                      | $\pm$ 2.25           |
| <b>raffinose</b>            | <b>4.23</b>     | $\pm$ <b>1.37</b>    | <b>34.83</b>              | $\pm$ <b>8.07</b>    |
| rhamnose                    | 6.12            | $\pm$ 0.80           | 5.23                      | $\pm$ 0.28           |
| ribose                      | 5.83            | $\pm$ 0.39           | 6.17                      | $\pm$ 0.42           |
| sucrose                     | 2482.67         | $\pm$ 224.15         | 3960.99                   | $\pm$ 791.67         |
| <b>trehalose</b>            | <b>1.75</b>     | $\pm$ <b>0.19</b>    | <b>1.25</b>               | $\pm$ <b>0.09</b>    |
| <b>Total sugars</b>         | <b>3382.27</b>  | $\pm$ <b>395.98</b>  | <b>5011.09</b>            | $\pm$ <b>1073.00</b> |
