# Supplementary material
Source: PubMed Central journal article supplement (PMC1488916)
Supplement: plntcell_tpc.105.036269_2.pdf [file plntcell_tpc.105.036269_2.pdf]

---

**Supplemental Table II: Primers used for the different methodical approaches**

The following primers were used for amplification of promoter (P) and open reading frames (D)

| <b>Name</b> | <b>Sequence</b>             |
|-------------|-----------------------------|
| P-PDX1.1FW  | gcatatggaagcttcacagg        |
| P-PDX1.1RW  | ttttctagggtttgagagag        |
| P-PDX1.2FW  | gaccaaattattctcacgcttg      |
| P-PDX1.2RW  | tttaggttctgtgagtttttag      |
| P-PDX1.3FW  | gcaaccaacgaggattatgg        |
| P-PDX1.3RW  | atagcctctaacttctctttaaac    |
| P-PDX2FW    | gcatccaaagcaaccgatggtacgggc |
| P-PDX2RW    | tgcggcggcgacggtcaaagaagagag |
| D-PDX1.3FW  | atggaaggaaccggcggttggtg     |
| D-PDX1.3RW  | tcactcggagcgattagcgaac      |
| D-PDX1.1FW  | atggcaggaaccggagttgtgg      |
| D-PDX1.1RW  | ctaacaaaaacgtgcaacac        |
| D-PDX2FW    | atgaccgtcggagtttttag        |
| D-PDX2RW    | ttattgaaatataggaagatc       |
| att1-site   | aaaaagcaggctat              |
| att2-site   | agaaagctgggt                |

For generation of gene specific probes and RT-PCR the following primers were used

| <b>Name</b> | <b>Sequence</b>       |
|-------------|-----------------------|
| PDX1,1FW    | cagactaaggagcttgggag  |
| PDX1,1RW    | ataaaatcttgaataaatcg  |
| PDX1,2FW    | tttgatgatgcagctaggttg |
| PDX1,2RW    | caaaaattctgcaacttttc  |
| PDX1,3FW    | tcactataaagccgatcc    |
| PDX1,3RW    | atcagcaggaacacgctcc   |
| PDX2FW      | atgaccgtcggagtttttag  |
| PDX2RW      | ttattgaaatataggaagatc |
| actin2FW    | tacaacgagcttcgtgttg   |
| actin2RW    | gattgatcctccgatccaga  |

For generation of T7-*in vitro* translation probes the following primers were used

| <b>Name</b> | <b>Sequence</b>                        |
|-------------|----------------------------------------|
| T7PDX1,2    | taatacgaactcactatagggagaatggcggatcaagc |
| PDX1,1RW    | tcaaactgccttgccc                       |

For map-based cloning the following primers were used

| <b>Name</b> | <b>Sequence</b>      |
|-------------|----------------------|
| CTR1.2FW    | ccactgtttctctctctag  |
| CTR1.2RW    | tatcaacagaacgcaccgag |
| NGA158FW    | acctgaaccatcctccgtc  |
| NGA158RW    | tcattttggccgacttagc  |
| 506908FW    | aatgaccaaccataaaaac  |
| 506908RW    | atcttcataaatcttctcag |

---
